# Supplementary material for: Paper-Based Electrochemical Biosensors for Voltammetric Detection of miRNA Biomarkers Using Reduced Graphene Oxide or MoS2 Nanosheets Decorated with Gold Nanoparticle Electrodes
Source: MDPI journal article supplement (doi:10.3390/bios11070236), 2021-07-13
Supplement: s1 [file s1]

# Supplementary Material

## Paper-based electrochemical biosensors for voltammetric detection of miRNA biomarkers using reduced graphene oxide or MoS<sub>2</sub> nanosheets decorated with gold nanoparticle electrodes

Hilal Torul <sup>1,a</sup>, Ece Yarali <sup>2,a</sup>, Ece Eksin <sup>2,a</sup>, Abhijit Ganguly <sup>3</sup>, John Benson <sup>4</sup>, Ugur Tamer <sup>1,\*</sup>, Pagona Papakonstantinou <sup>3,\*</sup> and Arzum Erdem <sup>2,\*</sup>

<sup>1</sup> Department of Analytical Chemistry, Faculty of Pharmacy, Gazi University, 06330 Ankara, Turkey

<sup>2</sup> Department of Analytical Chemistry, Faculty of Pharmacy, Ege University, 35100 Bornova, Turkey

<sup>3</sup> School of Engineering, Engineering Research Institute, Ulster University, Newtownabbey BT37 0QB, United Kingdom

<sup>4</sup> 2-DTech, Core Technology Facility, 46 Grafton Street, Manchester M13 9NT, United Kingdom

**Corresponding Authors:**

**E-mail addresses:** [arzum.erdem@ege.edu.tr](mailto:arzum.erdem@ege.edu.tr) (A. Erdem), [p.papakonstantinou@ulster.ac.uk](mailto:p.papakonstantinou@ulster.ac.uk) (P. Papakonstantinou), [utamer@gazi.edu.tr](mailto:utamer@gazi.edu.tr) (U. Tamer)

***miRNAs and the base sequences of all oligonucleotides:***

miRNA-155, miRNA-21 specific DNA probe, their synthetic target miRNA-155 or miRNA-21 and the other oligonucleotides; non-complementary RNA target, the oligonucleotides having a single base were obtained from (as lyophilized powder) TIB Molbiol (Germany). miRNAs and the base sequences of all oligonucleotides were listed below:

**thiol link miRNA-155 specific DNA probe (Probe-1)**

5'- SH-ACC CCT ATC ACG ATT AGC ATT AA-3'

**miRNA-155 RNA target**

5'- UUA AUG CUA AUC GUG AUA GGG GU-3'

**miRNA-155 non-complementary sequence (NC)**

5'-UGG CAG UGU CUU AGC UGG UUG U-3'

**miRNA-155 mismatch sequence (MM)**

5'-UUA AUG CUA AUC GUC AUA GGG GU-3'

**thiol link miRNA-21 specific DNA probe (Probe-2)**

5'- SH-TCA ACA TCA GTC TGA TAA GCT A-3'

**miRNA-21 RNA target**

5'- UAG CUU AUC AGA CUG AUG UUG A-3'

**miRNA-21 non-complementary sequence (NC)**

5'- AUG CAU GCA UGC AUG CAU GCA A-3'

**miRNA-21 mismatch sequence (MM)**

5'-UAG CUU AUC AGA CUC AUG UUG A-3'

The stock solutions of DNA probe and miRNA target were prepared in Tris-EDTA buffer (pH 8.00) and stored in freezer. The stock solutions were diluted using PBS (pH 7.40) solution.

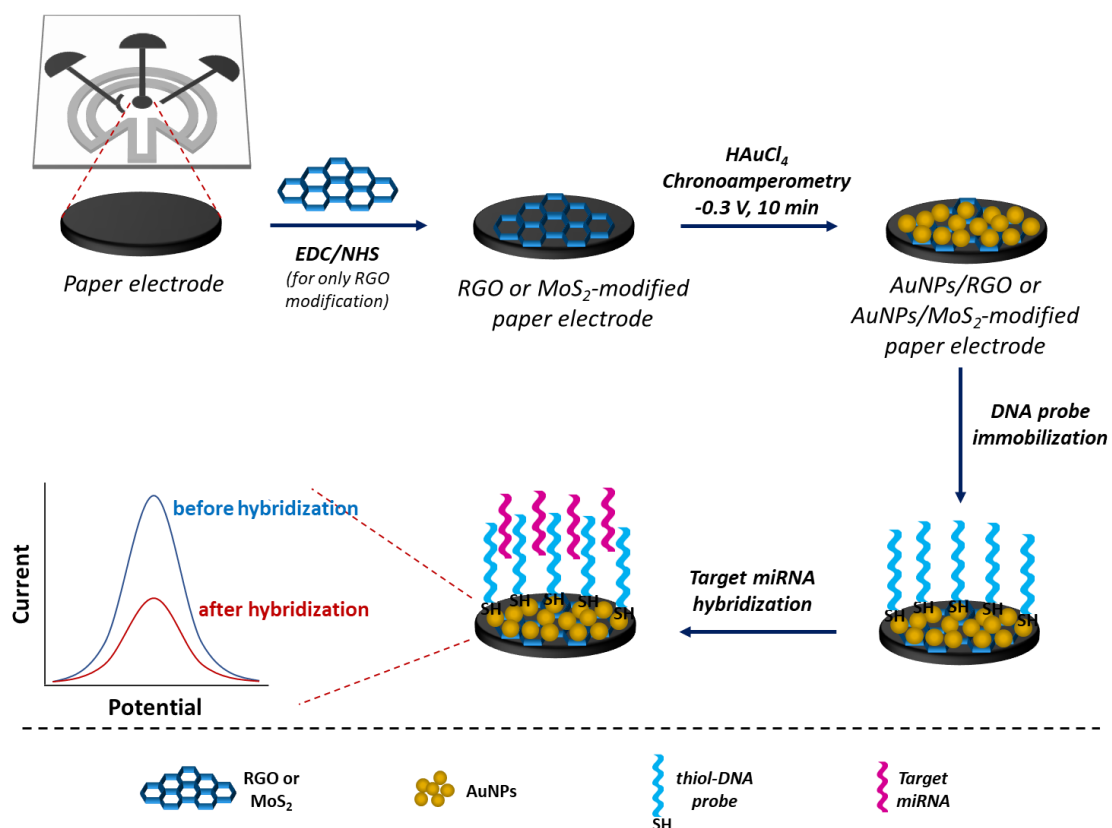

**Scheme S1.** The schematic illustration of RGO/MoS<sub>2</sub>-modified paper electrode assembly fabrication and Probe/miRNA assembling

The electrochemical characterization of RGO-modified paper electrode

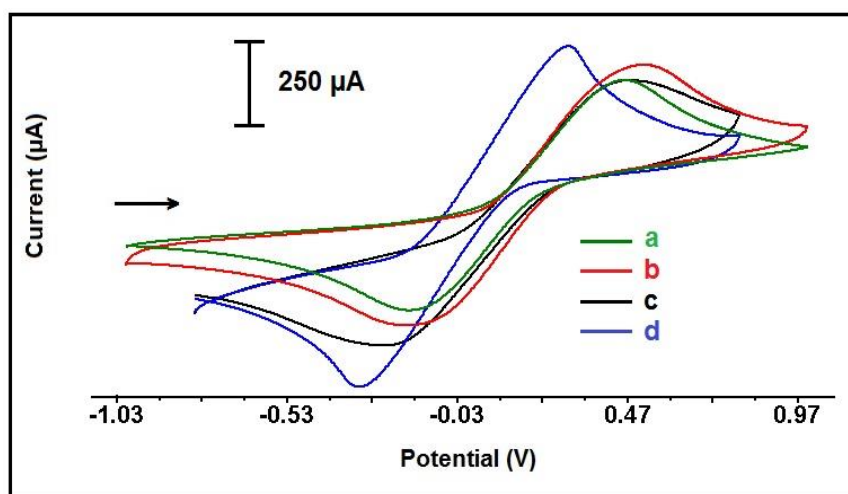

**Figure S1.** CVs recorded in optimum conditions by using (a) unmodified paper electrode, (b) RGO-modified paper electrode, (c) after activation of RGO-modified paper electrode using covalent agents, (d) after electrodeposition of AuNPs onto the surface of chemically activated and RGO-modified paper electrode in the presence of 50.0 mM potassium ferricyanide in 100.0 mM KCl.

**Table S1.** The anodic current  $I_a$  ( $\mu\text{A}$ ) and the cathodic current  $I_c$  ( $\mu\text{A}$ ), the relative charge,  $Q_a$  and  $Q_c$  of  $[\text{Fe}(\text{CN})_6]^{3-/4-}$  measured by unmodified, RGO modified, after activation of RGO-modified paper electrode using covalent agents and AuNPs/RGO-modified paper electrode.

|                                                                               | $I_a$ ( $\mu\text{A}$ ) | $I_c$ ( $\mu\text{A}$ ) | $Q_a$ (mC) | $Q_c$ (mC) | $A$ ( $\text{cm}^2$ ) |
|-------------------------------------------------------------------------------|-------------------------|-------------------------|------------|------------|-----------------------|
| <b>Unmodified paper electrode</b>                                             | 240                     | 281                     | 2.17       | 3.80       | 0.020                 |
| <b>RGO-modified paper electrode</b>                                           | 305.9                   | 347.9                   | 3.3        | 4.41       | 0.026                 |
| <b>after activation of RGO-modified paper electrode using covalent agents</b> | 211.3                   | 296.5                   | 2.23       | 4.97       | 0.018                 |
| <b>AuNPs/RGO-modified paper electrode</b>                                     | 425.6                   | 406                     | 2.53       | 4.87       | 0.036                 |

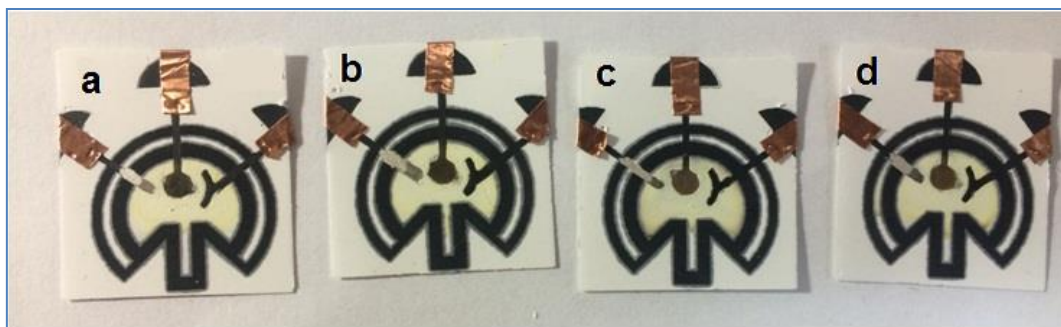

**Figure S2.** The images of (a) 2.5 mM, (b) 5.0 mM, (c) 10.0 mM, (d) 15.0 mM HAuCl<sub>4</sub> deposited RGO-modified paper electrode

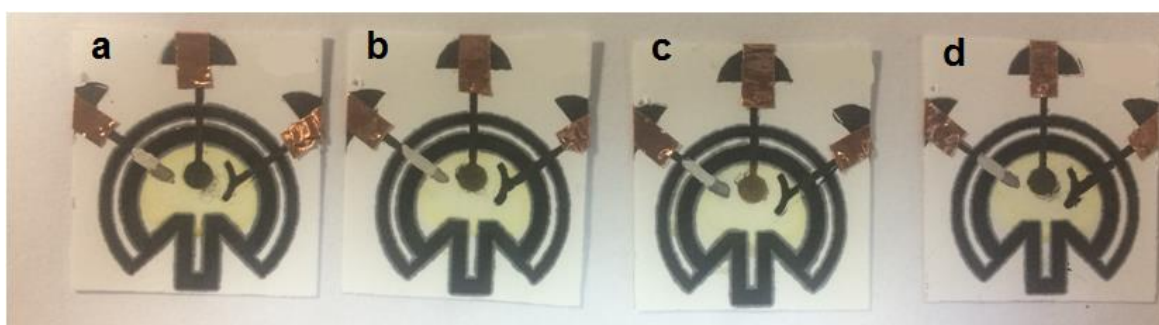

**Figure S3.** The images of AuNPs/RGO-modified paper electrode after deposition of 5.0 mM HAuCl<sub>4</sub> during (a) 5 min, (b) 7 min, (c) 10 min, (d) 15 min.

#### The effect of probe concentration at hybridization process

The effect of DNA probe concentration upon the hybridization was investigated (Fig. S4). The nucleic acid hybridization was performed between 2.0  $\mu\text{g/mL}$  miRNA-155 target and its DNA probe (Probe-1) at different concentration level from 0.5, 1.0 and 2.0  $\mu\text{g/mL}$ . After immobilization of 0.5  $\mu\text{g/mL}$  Probe-1, the average oxidation signal of  $[\text{Fe}(\text{CN})_6]^{3-/4-}$  was measured as  $32.43 \pm 1.12 \mu\text{A}$  (RSD%, 3.47%,  $n=3$ ). According to the signal measured in the absence of Probe-1, the highest decrease was obtained in the presence of 0.5  $\mu\text{g/mL}$  Probe-1 as 25.9% and measured as  $24.01 \pm 6.97 \mu\text{A}$  (RSD%, 29.01%,  $n=3$ ). Therefore, 0.5  $\mu\text{g/mL}$  Probe-1 concentration was determined as optimum for further studies.

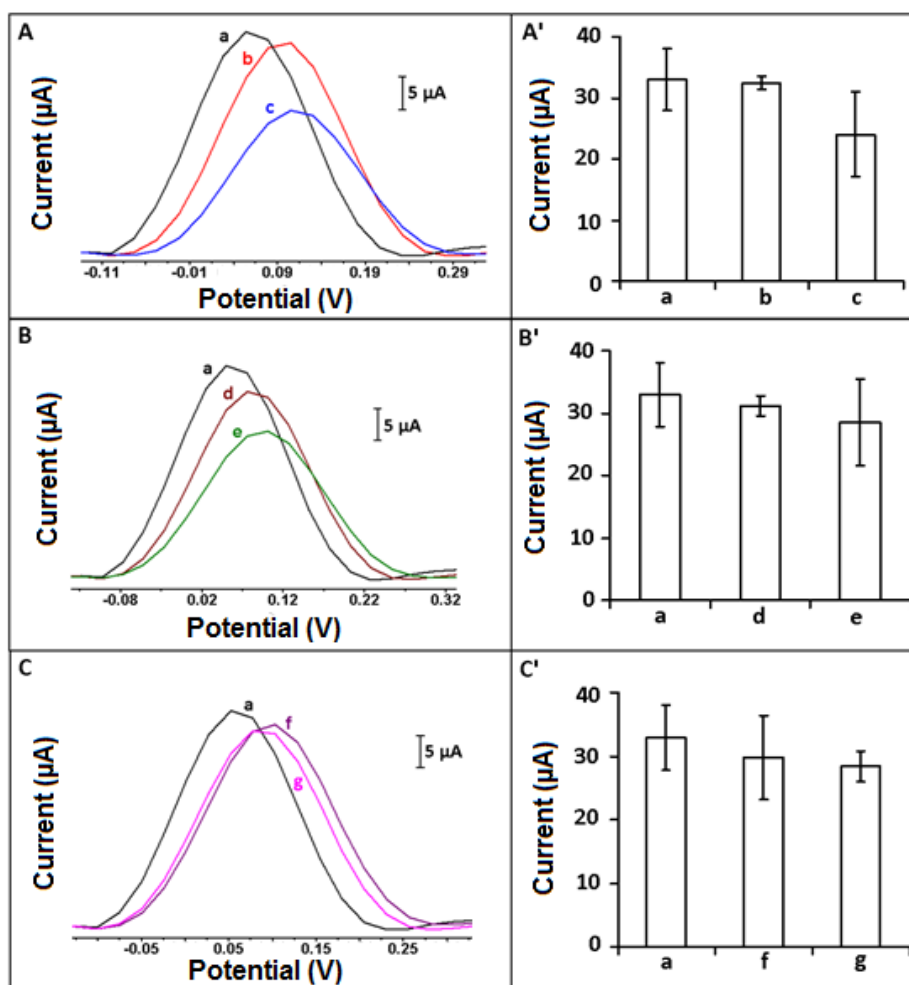

**Figure S4.** (A) DPVs (A') histograms representing (a) AuNPs/RGO-modified paper electrode, (b) 0.5  $\mu\text{g/mL}$  Probe-1 immobilized AuNPs/RGO-modified paper electrode, after hybridization of 0.5  $\mu\text{g/mL}$  miRNA 155 Probe-1 with (c) 2.0  $\mu\text{g/mL}$  miRNA-155 target ( $n=2$ ). (B) DPVs (B') histograms representing (d) 1.0  $\mu\text{g/mL}$  miRNA 155 Probe-1 immobilized AuNPs/RGO-modified paper electrode, after hybridization of 1.0  $\mu\text{g/mL}$  Probe-1 with (e) 2.0  $\mu\text{g/mL}$  miRNA-155 target ( $n=2$ ). (C) DPVs (C') histograms representing (f) 2.0  $\mu\text{g/mL}$  Probe-1 immobilized AuNPs/RGO-modified paper electrode, after hybridization of 2.0  $\mu\text{g/mL}$  Probe-1 with (g) 2.0  $\mu\text{g/mL}$  miRNA-155 target ( $n=2$ ).

#### The effect of probe immobilization time onto the electrode surface upon the hybridization process

For the optimization of probe immobilization time, a short period (i.e. 10 min) which was used in our previous work [35] in contrast to a longer period (i.e. 30 min) were tested. Since the electrode surface dried over 30 min, there is no need to examine a much longer immobilization time in our study.

In the absence of Probe-1, the oxidation signal of  $[\text{Fe}(\text{CN})_6]^{3-/4-}$  was measured as  $32.96 \pm 5.12 \mu\text{A}$  by AuNPs/RGO-modified paper electrode. The average oxidation signal of  $[\text{Fe}(\text{CN})_6]^{3-/4-}$  was measured as  $32.43 \pm 1.12 \mu\text{A}$  (RSD%, 3.47%,  $n=3$ ) and  $25.60 \pm 0.14 \mu\text{A}$  (RSD%, 0.55%,  $n=3$ ) after immobilization of 0.5  $\mu\text{g/mL}$  Probe-1 during 10 and 30 min, respectively (Fig. S5). According to the signal measured in the absence of Probe-1, the highest decrease at the oxidation signal was obtained in the case of 30

min Probe-1 immobilization as 22 % (Table S2). Thus, 30 min was chosen as optimum probe immobilization time for our further studies.

**Table S2.** The oxidation signal of  $[\text{Fe}(\text{CN})_6]^{3-/4-}$  measured before/after 0.5  $\mu\text{g/mL}$  DNA probe immobilization onto the surface of AuNPs/RGO-modified paper electrode during 10 and 30 min and HE% values.

|                                           |           | I ( $\mu\text{A}$ ) |            |
|-------------------------------------------|-----------|---------------------|------------|
| <b>AuNPs/RGO-modified paper electrode</b> |           | $32.96 \pm 5.12$    | <b>HE%</b> |
| <b>Probe-1 immobilization time (min)</b>  | <b>10</b> | $32.43 \pm 1.12$    | 1.6%       |
|                                           | <b>30</b> | $25.60 \pm 0.14$    | 22%        |

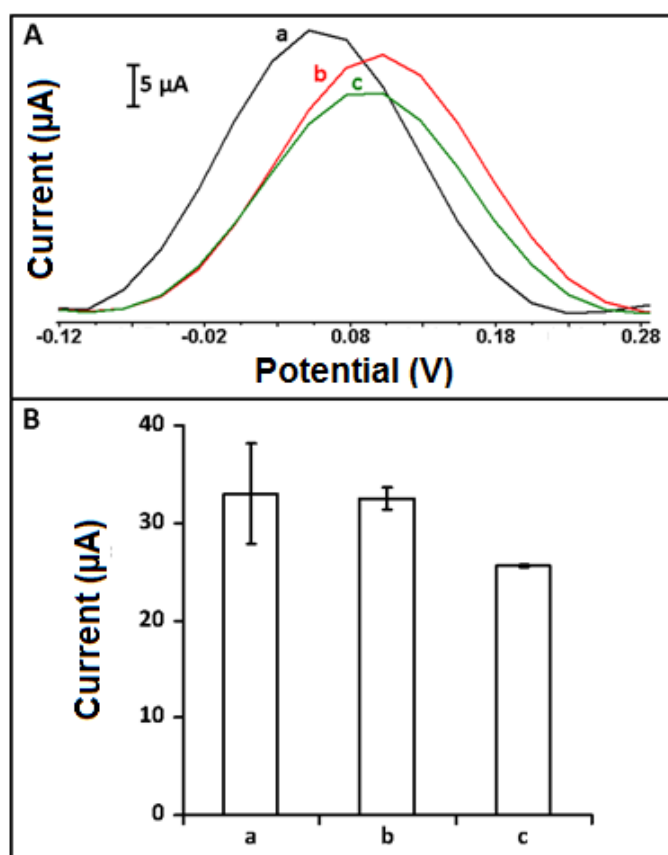

**Figure S5.** (A) DPVs (B) histograms representing 1.0 mM  $[\text{Fe}(\text{CN})_6]^{3-/4-}$  oxidation signal obtained by (a) AuNPs/RGO-modified paper electrode, after immobilization of 0.5  $\mu\text{g/mL}$  Probe-1 during (b) 10 min (c) 30 min onto the surface of AuNPs/RGO-modified paper electrode ( $n=3$ ).

#### The effect of hybridization time upon the hybridization process

For the optimization of hybridization time, a short (i.e. 5 min) which was used in our previous work [35], in contrast to a longer period (i.e. 15 min) were tested.

The hybridization of 0.5  $\mu\text{g/mL}$  Probe-1 and 1.0  $\mu\text{g/mL}$  miRNA-155 target was done during 5 and 15 min (Fig. S6). The average oxidation signal of  $[\text{Fe}(\text{CN})_6]^{3-/4-}$  was measured as  $16.70 \pm 4.17 \mu\text{A}$  (RSD%,

24.98%, n=4) and  $20.36 \pm 10.68 \mu\text{A}$  (RSD%, 52.46%, n=4) after hybridization of Probe-1 with miRNA-155 target during 5 min and 15 min, respectively. According to the signal measured in the absence of target, the highest decrease (28.9%) was recorded in the case of 5 min hybridization time. Thus, it was chosen as optimum hybridization time for further studies.

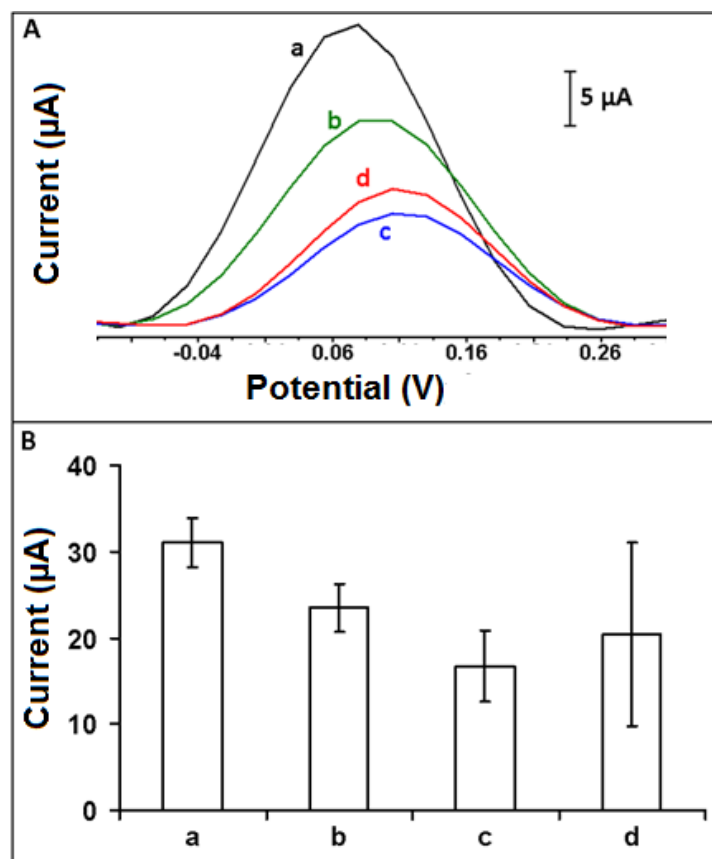

**Figure S6.** (A) DPVs, (B) histograms representing the  $[\text{Fe}(\text{CN})_6]^{3-/4-}$  oxidation signal obtained by (a) AuNPs/RGO-modified paper electrode, (b) 0.5  $\mu\text{g/mL}$  Probe-1 immobilized AuNPs/RGO-modified paper electrode, after the hybridization of Probe-1 with miRNA-155 target during (c) 5 min, (d) 15 min (n=4).

**Table S3.** The oxidation signal of  $[\text{Fe}(\text{CN})_6]^{3-/4-}$  measured before/after hybridization of Probe-1 and miRNA-155 target in its different concentrations (n=3) and HE% values.

|                                                        |      | I ( $\mu\text{A}$ ) |       |
|--------------------------------------------------------|------|---------------------|-------|
| Probe-1 immobilized AuNPs/RGO-modified paper electrode |      | $26.79 \pm 2.42$    | HE%   |
| [miRNA-155] ( $\mu\text{g/mL}$ )                       | 0.25 | $24.69 \pm 0.34$    | 7.8%  |
|                                                        | 0.5  | $22.34 \pm 3.06$    | 16.6% |
|                                                        | 0.75 | $18.01 \pm 0.20$    | 32.7% |
|                                                        | 1    | $16.83 \pm 1.91$    | 37.1% |
|                                                        | 1.5  | $16.94 \pm 0.76$    | 36.7% |
|                                                        | 2    | $17.25 \pm 0.95$    | 35.6% |



**Table S4.** The oxidation signal of  $[\text{Fe}(\text{CN})_6]^{3-/4-}$  and decrease % at the signal after hybridization of Probe-2 and miRNA-21 target in its different concentrations (n=3).

|                                                               |      | I ( $\mu\text{A}$ ) |            |
|---------------------------------------------------------------|------|---------------------|------------|
| <b>Probe-2 immobilized AuNPs/RGO-modified paper electrode</b> |      | $29.70 \pm 0.20$    | <b>HE%</b> |
| <b>[miRNA-21] (<math>\mu\text{g/mL}</math>)</b>               | 0.25 | $27.36 \pm 3.59$    | 7.8%       |
|                                                               | 0.5  | $23.40 \pm 2.96$    | 21.2%      |
|                                                               | 0.75 | $20.73 \pm 2.34$    | 30.2%      |
|                                                               | 1    | $16.85 \pm 1.09$    | 43.2%      |
|                                                               | 1.5  | $17.22 \pm 0.65$    | 42.0%      |
|                                                               | 2    | $17.16 \pm 0.08$    | 42.2%      |

**Selectivity of the assay on voltammetric detection of miRNA-155 by AuNPs/RGO-modified paper electrode**

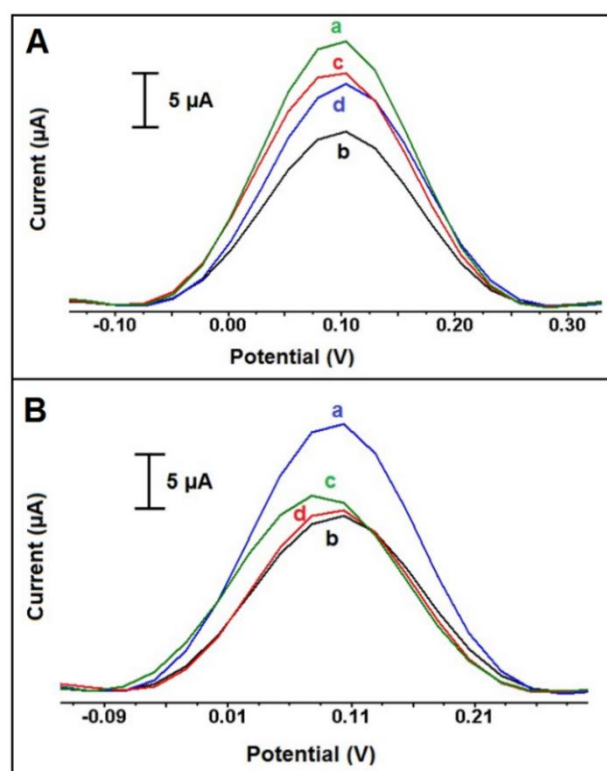

**Figure S7.** (A) Voltammograms representing the  $[\text{Fe}(\text{CN})_6]^{3-/4-}$  oxidation signal obtained by (a) Probe-1 immobilized AuNPs/RGO-modified paper electrode in the absence of miRNA-155 target, after hybridization of Probe-1 with (b) miRNA-155 target, (c) NC, and (d) MM, individually. (B) Voltammograms representing the  $[\text{Fe}(\text{CN})_6]^{3-/4-}$  oxidation signal obtained by (a) Probe-1 immobilized AuNPs/RGO-modified paper electrode in the absence of miRNA-155 target, after hybridization of

Probe-1 (b) with only miRNA-155 target, (c) in target:NC (1:1) mixture, and (d) in target:MM (1:1) mixture.

**Table S5.** The average  $[\text{Fe}(\text{CN})_6]^{3-/4-}$  oxidation signals measured before and after hybridization of Probe-1 with miRNA-155 target, NC, MM, the mixture sample containing target:NC (1:1) or the mixture sample containing target:MM (1:1). HE% calculated according to the oxidation signals obtained after hybridization.

|                                                               | <b>I (<math>\mu\text{A}</math>)</b> |            |
|---------------------------------------------------------------|-------------------------------------|------------|
| <b>Probe-1 immobilized AuNPs/RGO-modified paper electrode</b> | $29.47 \pm 0.44 \mu\text{A}$        | <b>HE%</b> |
| <b>miRNA-155 target</b>                                       | $17.32 \pm 3.22 \mu\text{A}$        | 41.2%      |
| <b>NC</b>                                                     | $20.05 \pm 2.35 \mu\text{A}$        | 31.9%      |
| <b>MM</b>                                                     | $20.04 \pm 2.71 \mu\text{A}$        | 31.9%      |
| <b>miRNA-155 target:NC (1:1) mixture</b>                      | $18.40 \pm 1.62 \mu\text{A}$        | 37.5%      |
| <b>miRNA-155 target:MM (1:1) mixture</b>                      | $21.67 \pm 5.12 \mu\text{A}$        | 26.4%      |

**Selectivity of the assay on voltammetric detection of miRNA-21 by AuNPs/RGO-modified paper electrode**

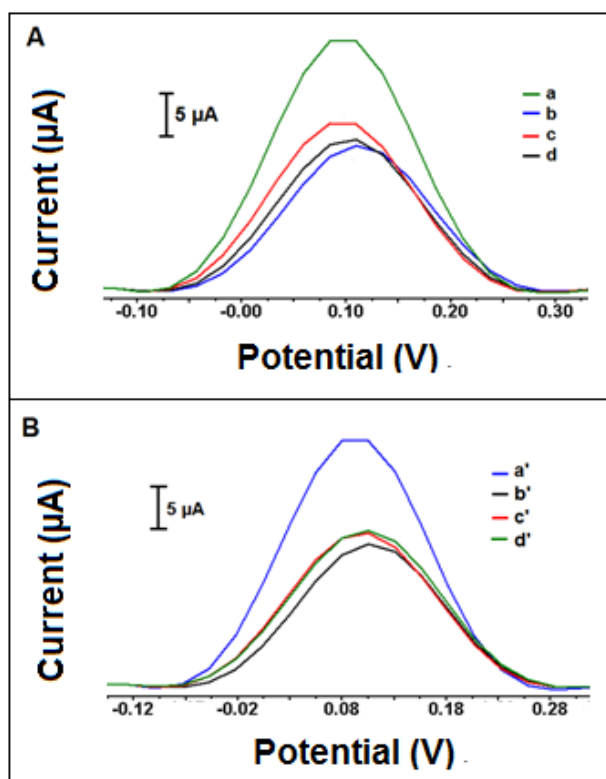

**Figure S8.** (A) Voltammograms representing the  $[\text{Fe}(\text{CN})_6]^{3-/4-}$  oxidation signal obtained by (a) Probe-2 immobilized AuNPs/RGO-modified paper electrode in the absence of miRNA-21 target, after hybridization of Probe-2 with (b) miRNA-21 target, (c) NC, and (d) MM, individually. (B) Voltammograms representing the  $[\text{Fe}(\text{CN})_6]^{3-/4-}$  oxidation signal obtained by (a') Probe-2 immobilized AuNPs/RGO-modified paper electrode in the absence of miRNA-21 target, after hybridization of Probe-2 (b') with only miRNA-21 target, (c') in target:NC (1:1) mixture, and (d') in target:MM (1:1) mixture

**Table S6.** The average  $[\text{Fe}(\text{CN})_6]^{3-/4-}$  oxidation signals measured before and after hybridization of Probe-2 with miRNA-21 target, NC, MM, the mixture sample containing target:NC (1:1) or the mixture sample containing target:MM (1:1). HE % calculated according to the oxidation signals obtained after hybridization.

|                                                               | I ( $\mu\text{A}$ )          |            |
|---------------------------------------------------------------|------------------------------|------------|
| <b>Probe-2 immobilized AuNPs/RGO-modified paper electrode</b> | $25.83 \pm 5.08 \mu\text{A}$ | <b>HE%</b> |
| <b>miRNA-21 target</b>                                        | $17.00 \pm 3.17 \mu\text{A}$ | 34.1%      |
| <b>NC</b>                                                     | $20.64 \pm 5.75 \mu\text{A}$ | 20.1%      |
| <b>MM</b>                                                     | $18.65 \pm 4.12 \mu\text{A}$ | 27.8%      |
| <b>miRNA-21 target:NC (1:1) mixture</b>                       | $17.65 \pm 4.09 \mu\text{A}$ | 31.7%      |
| <b>miRNA-21 target:MM (1:1) mixture</b>                       | $18.44 \pm 4.09 \mu\text{A}$ | 28.6%      |

**Results obtained by AuNPs/MoS<sub>2</sub>-modified paper electrode**

The electrochemical characterization of AuNPs/MoS<sub>2</sub>-modified paper electrode

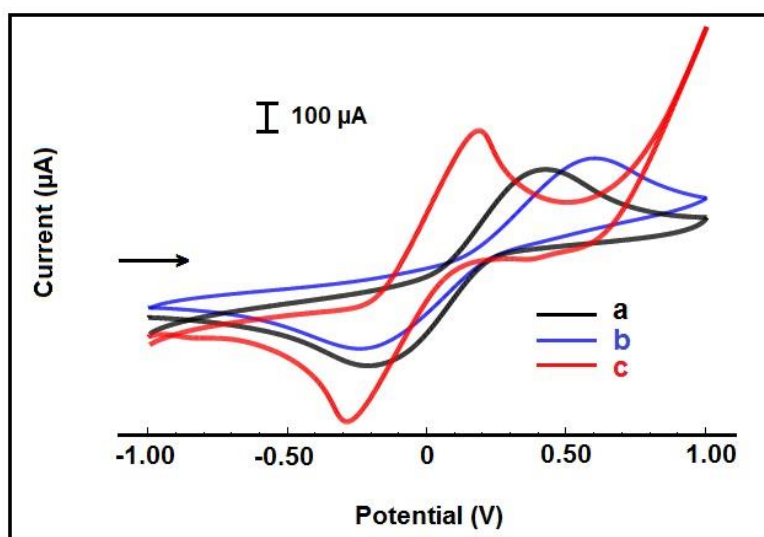

**Figure S9.** CVs recorded in optimum conditions by (a) unmodified paper electrode, (b) MoS<sub>2</sub>-modified paper electrode, (c) AuNPs electrodeposited MoS<sub>2</sub>-modified paper electrodes in the presence of 50.0 mM potassium ferricyanide in 100.0 mM KCl.

**Table S7.** The anodic current  $I_a$  ( $\mu\text{A}$ ) and the cathodic current  $I_c$  ( $\mu\text{A}$ ), the relative charge,  $Q_a$  and  $Q_c$  of  $[\text{Fe}(\text{CN})_6]^{3-/4-}$  measured by unmodified,  $\text{MoS}_2$  modified and AuNPs/ $\text{MoS}_2$ -modified paper electrode.

|                                                                 | <b><math>I_a</math> (<math>\mu\text{A}</math>)</b> | <b><math>I_c</math> (<math>\mu\text{A}</math>)</b> | <b><math>Q_a</math> (mC)</b> | <b><math>Q_c</math> (mC)</b> | <b><math>A</math> (<math>\text{cm}^2</math>)</b> |
|-----------------------------------------------------------------|----------------------------------------------------|----------------------------------------------------|------------------------------|------------------------------|--------------------------------------------------|
| <b>Unmodified paper electrode</b>                               | 236.15                                             | 241.36                                             | 2.23                         | 3.10                         | 0.020                                            |
| <b><math>\text{MoS}_2</math>-modified paper electrode</b>       | 245.23                                             | 280.60                                             | 2.21                         | 3.91                         | 0.021                                            |
| <b>AuNPs/<math>\text{MoS}_2</math>-modified paper electrode</b> | 415.77                                             | 448.02                                             | 4.40                         | 4.91                         | 0.035                                            |

**The effect of probe concentration at hybridization process:**

The effect of DNA probe concentration upon the hybridization was investigated (Fig. S10). The nucleic acid hybridization was performed between  $1.0 \mu\text{g/mL}$  miRNA-155 target and its Probe-1 at the different concentration level from 0.5, and  $1.0 \mu\text{g/mL}$  onto the surface of AuNPs/ $\text{MoS}_2$ -modified paper electrode. After immobilization of  $0.5 \mu\text{g/mL}$  Probe-1, the average oxidation signal of  $[\text{Fe}(\text{CN})_6]^{3-/4-}$  was measured as  $28.39 \pm 0.94 \mu\text{A}$  (RSD%, 3.32%,  $n=5$ ), whereas the oxidation signal was measured as  $32.06 \pm 0.76 \mu\text{A}$  (RSD%, 2.36%,  $n=3$ ) after immobilization of  $1.0 \mu\text{g/mL}$  Probe-1. After hybridization of  $0.5 \mu\text{g/mL}$  or  $1.0 \mu\text{g/mL}$  Probe-1 with miRNA-155 target the oxidation signals were measured as  $22.61 \pm 0.62 \mu\text{A}$  (RSD%, 2.74%,  $n=3$ ) and  $24.59 \pm 2.79 \mu\text{A}$  (RSD%, 11.35%,  $n=3$ ), respectively. According to the more reproducible results,  $0.5 \mu\text{g/mL}$  Probe-1 concentration was determined as optimum for further studies.

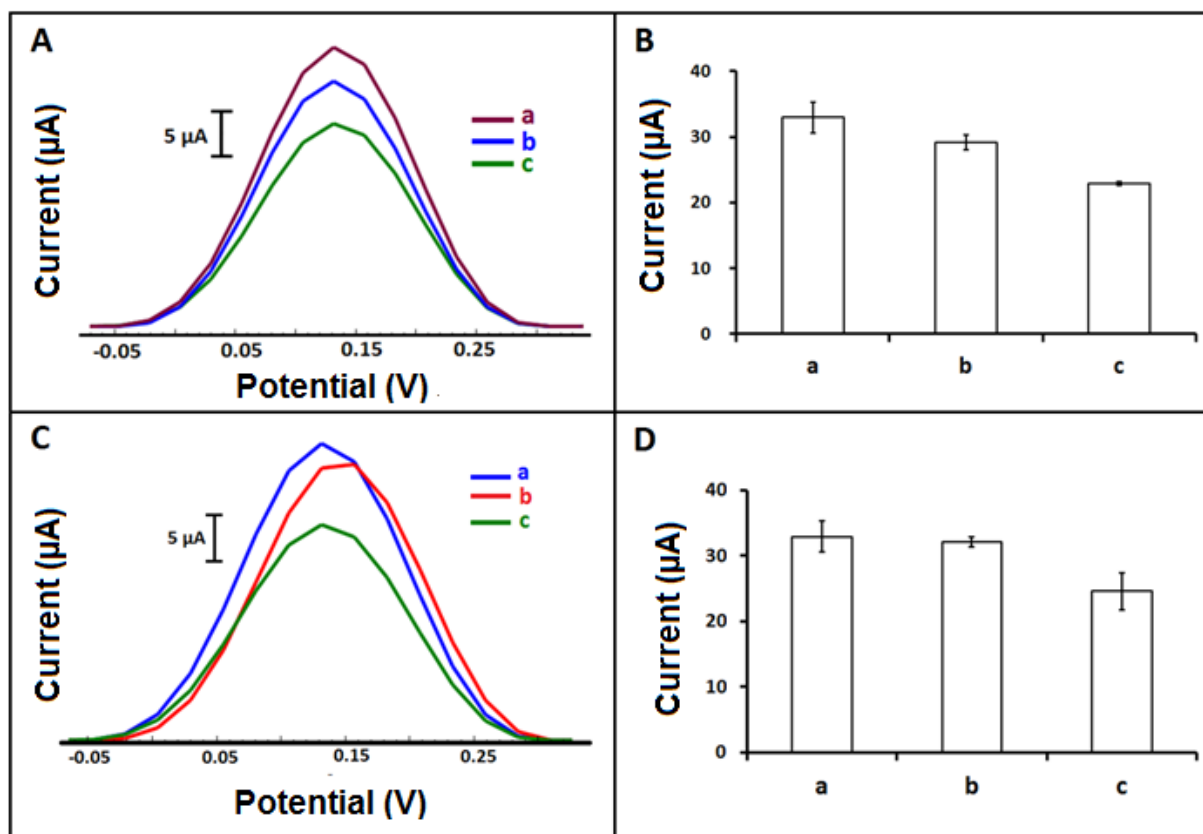

**Figure S10.** (A) DPVs (B) histograms representing (a) AuNPs/MoS<sub>2</sub>-modified paper electrode, (b) 0.5 µg/mL DNA probe immobilized AuNPs/MoS<sub>2</sub>-modified paper electrode, (c) after hybridization of 0.5 µg/mL DNA probe with 1.0 µg/mL miRNA-155 target (n=2). (C) DPVs (D) histograms representing (a) AuNPs/MoS<sub>2</sub>-modified paper electrode, (b) 1.0 µg/mL DNA probe immobilized AuNPs/MoS<sub>2</sub>-modified paper electrode, (c) after hybridization of 1.0 µg/mL DNA probe with 1.0 µg/mL miRNA-155 target (n=2).

#### The effect of hybridization time upon the hybridization process

The hybridization of 0.5 µg/mL Probe-1 and 1.0 µg/mL miRNA-155 target was done during 5 and 15 min hybridization time (Fig. S11). The average oxidation signal of [Fe(CN)<sub>6</sub>]<sup>3-/4-</sup> was measured as 22.95 ± 0.30 µA (RSD%, 1.33%, n=2) and 30.55 ± 7.40 µA (RSD%, 24.24%, n=3) after hybridization of Probe-1 with miRNA-155 target during 5 min and 15 min, respectively. According to the signal obtained in the absence of target, the highest decrease as 32% was obtained in case of 5 min hybridization time. Thus, 5 min hybridization time was chosen as optimum for further studies.

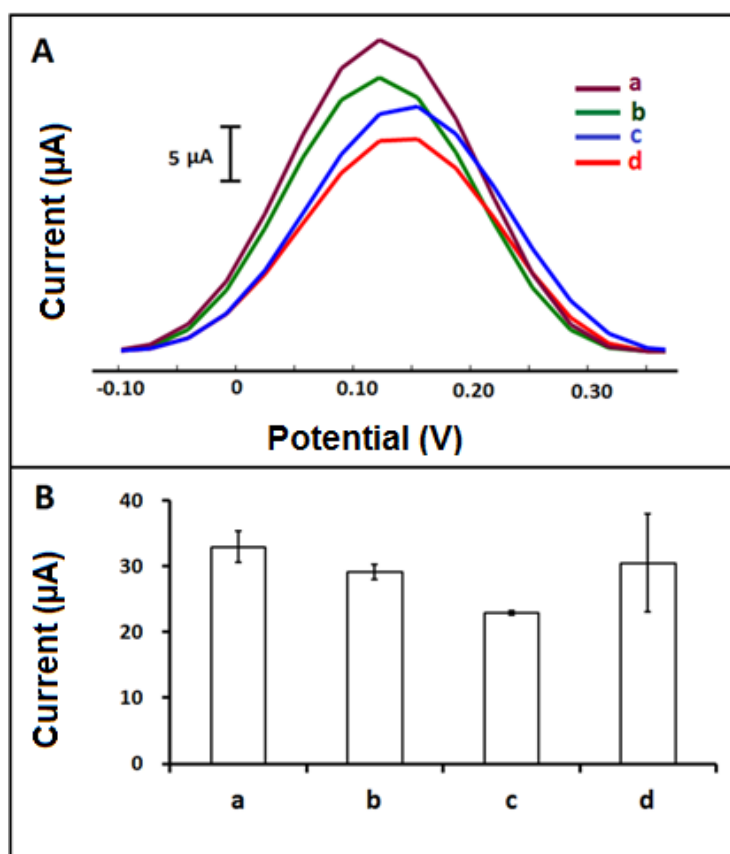

**Figure S11.** (A) DPVs, (B) histograms representing the  $[\text{Fe}(\text{CN})_6]^{3-/4-}$  oxidation signal obtained by (a) AuNPs/MoS<sub>2</sub>-modified paper electrode, (b) 0.5 μg/mL Probe-1 immobilized AuNPs/MoS<sub>2</sub>-modified paper electrode, after the hybridization of Probe-1 with miRNA-155 target during (c) 5 min, (d) 15 min (n=3).

#### Voltammetric detection of miRNA-21 by AuNPs and MoS<sub>2</sub>-modified paper electrode

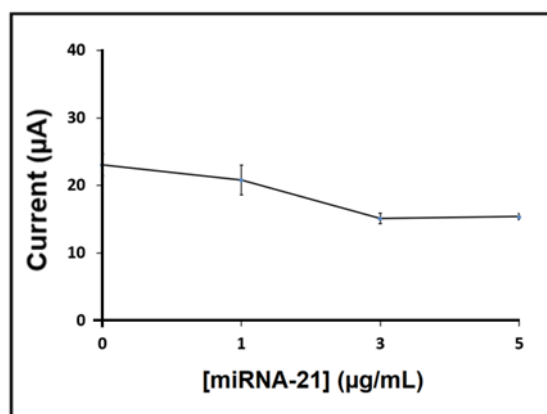

**Figure S12.** The line graph based on the average  $[\text{Fe}(\text{CN})_6]^{3-/4-}$  oxidation signal measured after hybridization between Probe-2 and miRNA-21 target with its various concentrations from 0 to 5.0 μg/mL (n=3).

**Table S8.** The oxidation signal of  $[\text{Fe}(\text{CN})_6]^{3-/4-}$  and HE% values that calculated after hybridization of Probe-2 and miRNA-21 target in its different concentrations (n=3).

|                                                                           |     | I ( $\mu\text{A}$ ) |            |
|---------------------------------------------------------------------------|-----|---------------------|------------|
| <b>Probe-2 immobilized AuNPs/MoS<sub>2</sub>-modified paper electrode</b> |     | 23.06 $\pm$ 1.59    | <b>HE%</b> |
| <b>[miRNA-21] (<math>\mu\text{g/mL}</math>)</b>                           | 0.5 | 22.48 $\pm$ 1.62    | 2.5%       |
|                                                                           | 1   | 20.80 $\pm$ 2.21    | 9.8%       |
|                                                                           | 1.5 | 19.14 $\pm$ 1.92    | 16.9%      |
|                                                                           | 2   | 17.35 $\pm$ 0.65    | 24.7%      |
|                                                                           | 2.5 | 16.69 $\pm$ 0.92    | 27.6%      |
|                                                                           | 3   | 15.13 $\pm$ 0.76    | 34.3%      |
|                                                                           | 5   | 15.38 $\pm$ 0.45    | 33.3%      |

### Voltammetric detection of miRNA-155 by AuNPs and MoS<sub>2</sub>-modified paper electrode

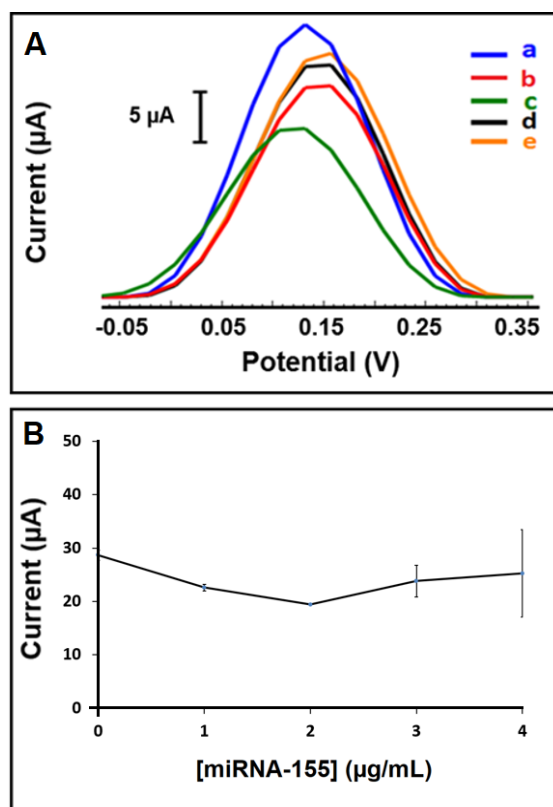

**Figure S13.** (A) Voltammograms representing the  $[\text{Fe}(\text{CN})_6]^{3-/4-}$  oxidation signals obtained by (a) Probe-1 immobilized AuNPs/MoS<sub>2</sub>-paper electrode, after hybridization of Probe-1 with miRNA-155 target at the concentrations of (b) 1.0  $\mu\text{g/mL}$ , (c) 2.0  $\mu\text{g/mL}$ , (d) 3.0  $\mu\text{g/mL}$ , (e) 4.0  $\mu\text{g/mL}$ . (B) The line graph based on the average  $[\text{Fe}(\text{CN})_6]^{3-/4-}$  oxidation signal after hybridization between Probe-1 and miRNA-155 target with its various concentrations from 0 to 4.0  $\mu\text{g/mL}$  (n=3).



**Table S9.** The oxidation signal of  $[\text{Fe}(\text{CN})_6]^{3-/4-}$  and HE% values that calculated after hybridization of Probe-1 and miRNA-155 target in its different concentrations (n=3).

|                                                                           |   | I ( $\mu\text{A}$ ) |            |
|---------------------------------------------------------------------------|---|---------------------|------------|
| <b>Probe-1 immobilized AuNPs/MoS<sub>2</sub>-modified paper electrode</b> |   | $28.65 \pm 0.94$    | <b>HE%</b> |
| <b>[miRNA-155] (<math>\mu\text{g/mL}</math>)</b>                          | 1 | $22.61 \pm 0.62$    | 21.0%      |
|                                                                           | 2 | $19.38 \pm 0.04$    | 32.3%      |
|                                                                           | 3 | $23.80 \pm 2.98$    | 16.9%      |
|                                                                           | 4 | $25.24 \pm 8.17$    | 11.9%      |

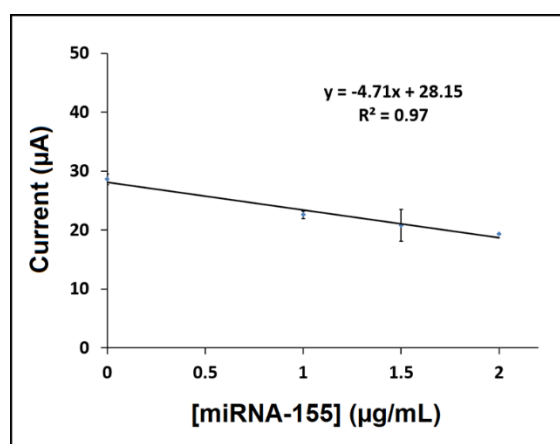

**Figure S14.** The calibration plot obtained after hybridization between Probe-1 and miRNA-155 target with its various concentrations from 0 to 2.0  $\mu\text{g/mL}$  (n=3).

### Selectivity of the assay on voltammetric detection of miRNA-155 by AuNPs and MoS<sub>2</sub>-modified paper electrode

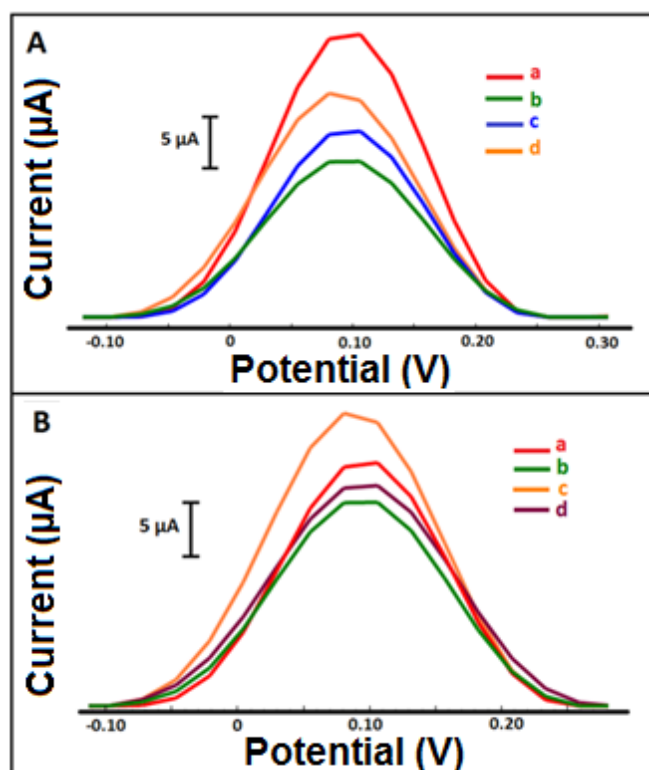

**Figure S15.** (A) Voltammograms representing the  $[\text{Fe}(\text{CN})_6]^{3-/4-}$  oxidation signal obtained by (a) Probe-1 immobilized AuNPs/MoS<sub>2</sub>-modified paper electrode in the absence of miRNA-155 target, after hybridization of Probe-1 with (b) miRNA-155 target, (c) NC, and (d) MM, individually. (B) Voltammograms representing the  $[\text{Fe}(\text{CN})_6]^{3-/4-}$  oxidation signal obtained by (a) Probe-1 immobilized AuNPs/MoS<sub>2</sub>-modified paper electrode in the absence of miRNA-155 target, after hybridization of Probe-1 (b) with only miRNA-155 target, (c) in target:NC (1:1) mixture, and (d) in target:MM (1:1) mixture.

**Table S10.** The average  $[\text{Fe}(\text{CN})_6]^{3-/4-}$  oxidation signals (n=2) measured before and after hybridization of Probe-1 with miRNA-155 target, NC, MM, the mixture sample containing target:NC (1:1) or the mixture sample containing target:MM (1:1). HE% calculated according to the oxidation signals obtained after hybridization.

|                                                                           | I (μA)       |            |
|---------------------------------------------------------------------------|--------------|------------|
| <b>Probe-1 immobilized AuNPs/MoS<sub>2</sub>-modified paper electrode</b> | 28.39 ± 0.94 | <b>HE%</b> |
| <b>miRNA-155 target</b>                                                   | 19.74 ± 1.75 | 30.5 %     |
| <b>NC</b>                                                                 | 30.77 ± 8.37 | 8 %        |
| <b>MM</b>                                                                 | 22.52 ± 2.80 | 20.6 %     |
| <b>miRNA-155 target:NC (1:1) mixture</b>                                  | 20.59 ± 2.59 | 27.5 %     |
| <b>miRNA-155 target:MM (1:1) mixture</b>                                  | 21.23 ± 3.00 | 25.2 %     |

### Selectivity of the assay on voltammetric detection of miRNA-21 by AuNPs and MoS<sub>2</sub>-modified paper electrode

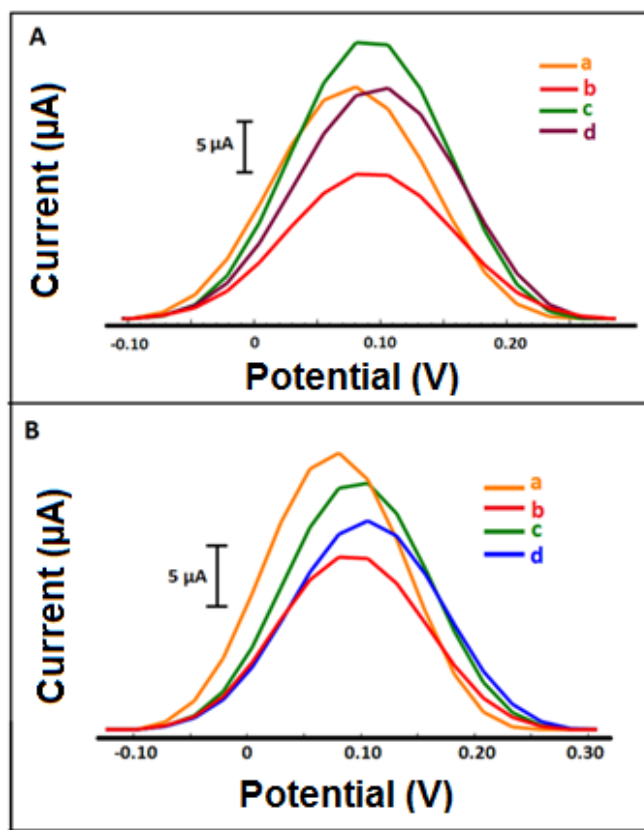

**Figure S16.** (A) Voltammograms representing the [Fe(CN)<sub>6</sub>]<sup>3-/4-</sup> oxidation signal obtained by (a) Probe-2 immobilized AuNPs/MoS<sub>2</sub>-modified paper electrode in the absence of miRNA-21 target, after hybridization of Probe-2 with, (b) miRNA-21 target, (c) NC, and (d) MM, individually. (B) Voltammograms representing the [Fe(CN)<sub>6</sub>]<sup>3-/4-</sup> oxidation signal obtained by (a) Probe-2 immobilized AuNPs/MoS<sub>2</sub>-modified paper electrode in the absence of miRNA-21 target, after hybridization of Probe-2 (b) with only miRNA-21 target, (c) target:NC (1:1) mixture, and (d) in target:MM (1:1) mixture.

**Table S11.** The average [Fe(CN)<sub>6</sub>]<sup>3-/4-</sup> oxidation signals (n=2) measured before and after hybridization of Probe-2 with miRNA-21 target, NC, MM, the mixture sample containing target:NC (1:1) or the mixture sample containing target:MM (1:1). HE% calculated according to the oxidation signals obtained after hybridization.

|                                                                                   | I (μA)       |            |
|-----------------------------------------------------------------------------------|--------------|------------|
| <b>Probe-2 immobilized<br/>AuNPs/MoS<sub>2</sub>-modified paper<br/>electrode</b> | 23.06 ± 1.59 | <b>HE%</b> |
| <b>miRNA-21 target</b>                                                            | 16.20 ± 3.12 | 29 %       |
| <b>NC</b>                                                                         | 27.13 ± 3.01 | 17 %       |
| <b>MM</b>                                                                         | 24.54 ± 3.92 | 6 %        |
| <b>miRNA-21 target:NC (1:1) mixture</b>                                           | 21.66 ± 4.79 | 6 %        |
| <b>miRNA-21 target:MM (1:1) mixture</b>                                           | 21.88 ± 5.24 | 5%         |
